# Supplementary material
Source: HighWire-hosted journal article supplement (https://jnm.snmjournals.org/highwire/filestream/103976/field_highwire_adjunct_files/0/254656_Supplemental_Data.pdf)
Supplement: 254656_Supplemental_Data.pdf [file 254656_Supplemental_Data.pdf]

# Supplemental Material

**Supplemental Table 1:** Results of the Kolmogorov-Smirnov (K-S) test along with p-values, on five full datasets with complete listing of half-lives for all patients, as listed in Table 2. P-values larger than 0.05 indicate match with the null hypothesis (e.g. that data distribution is normal, top, or log-normal, bottom)

|                   | <sup>177</sup> Lu-DOTATATE<br>Kidney<br>(Study 1) | <sup>177</sup> Lu-DOTATATE<br>Kidney<br>(Study 4) | <sup>177</sup> Lu-DOTATATE<br>BM<br>(Study 4) | <sup>177</sup> Lu-DOTATATE<br>Tumour<br>(Study 4) | <sup>177</sup> Lu-PSMA-I&T<br>Tumour<br>(Study 8) |
|-------------------|---------------------------------------------------|---------------------------------------------------|-----------------------------------------------|---------------------------------------------------|---------------------------------------------------|
| <b>Normal</b>     | Yes                                               | No                                                | No                                            | No                                                | No                                                |
| <b>p-value</b>    | 0.08                                              | 5.40E-17                                          | 1.74E-04                                      | 8.49E-08                                          | 0.001                                             |
| <b>Log-Normal</b> | Yes                                               | No                                                | Yes                                           | No                                                | Yes                                               |
| <b>p-value</b>    | 0.47                                              | 5.86E-06                                          | 0.60                                          | 0.0010                                            | 0.71                                              |

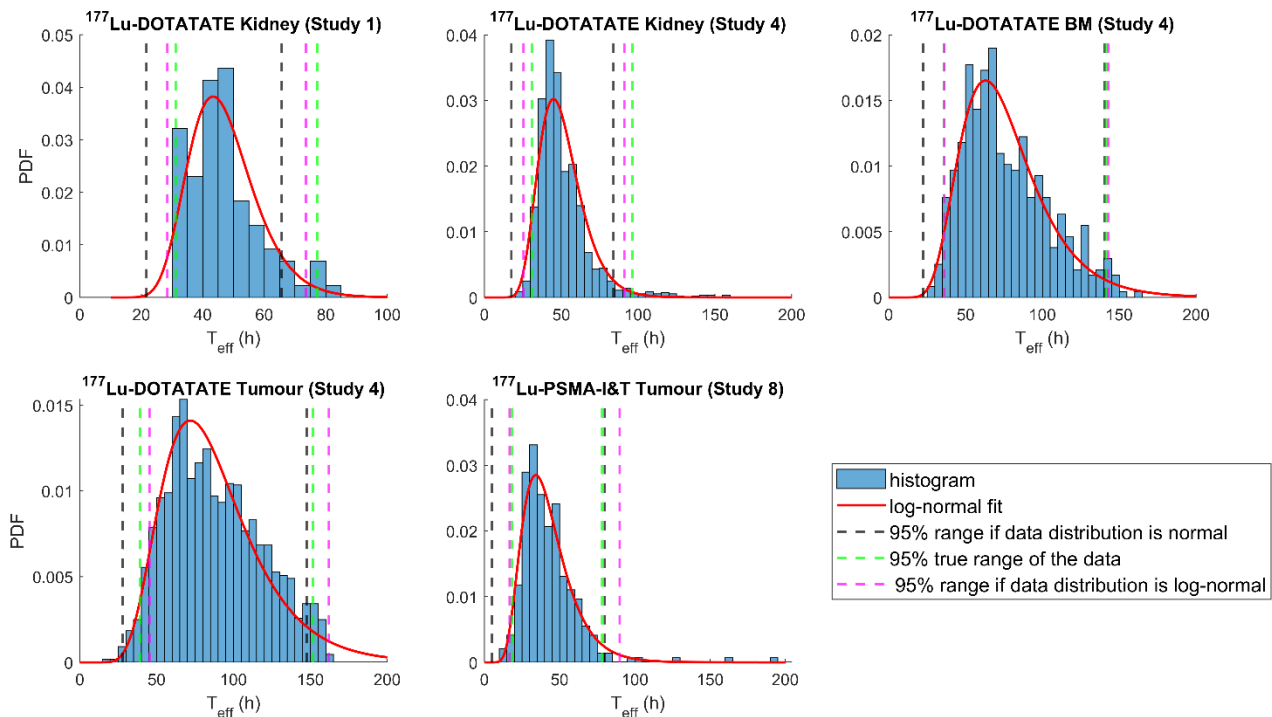

**Supplemental Figure 1:** Distribution fitting and 95% confidential interval (range) comparison of effective half-lives for the five full datasets mentioned in Table S1, involving <sup>177</sup>Lu-Dotatate and <sup>177</sup>Lu-PSMA-I&T.

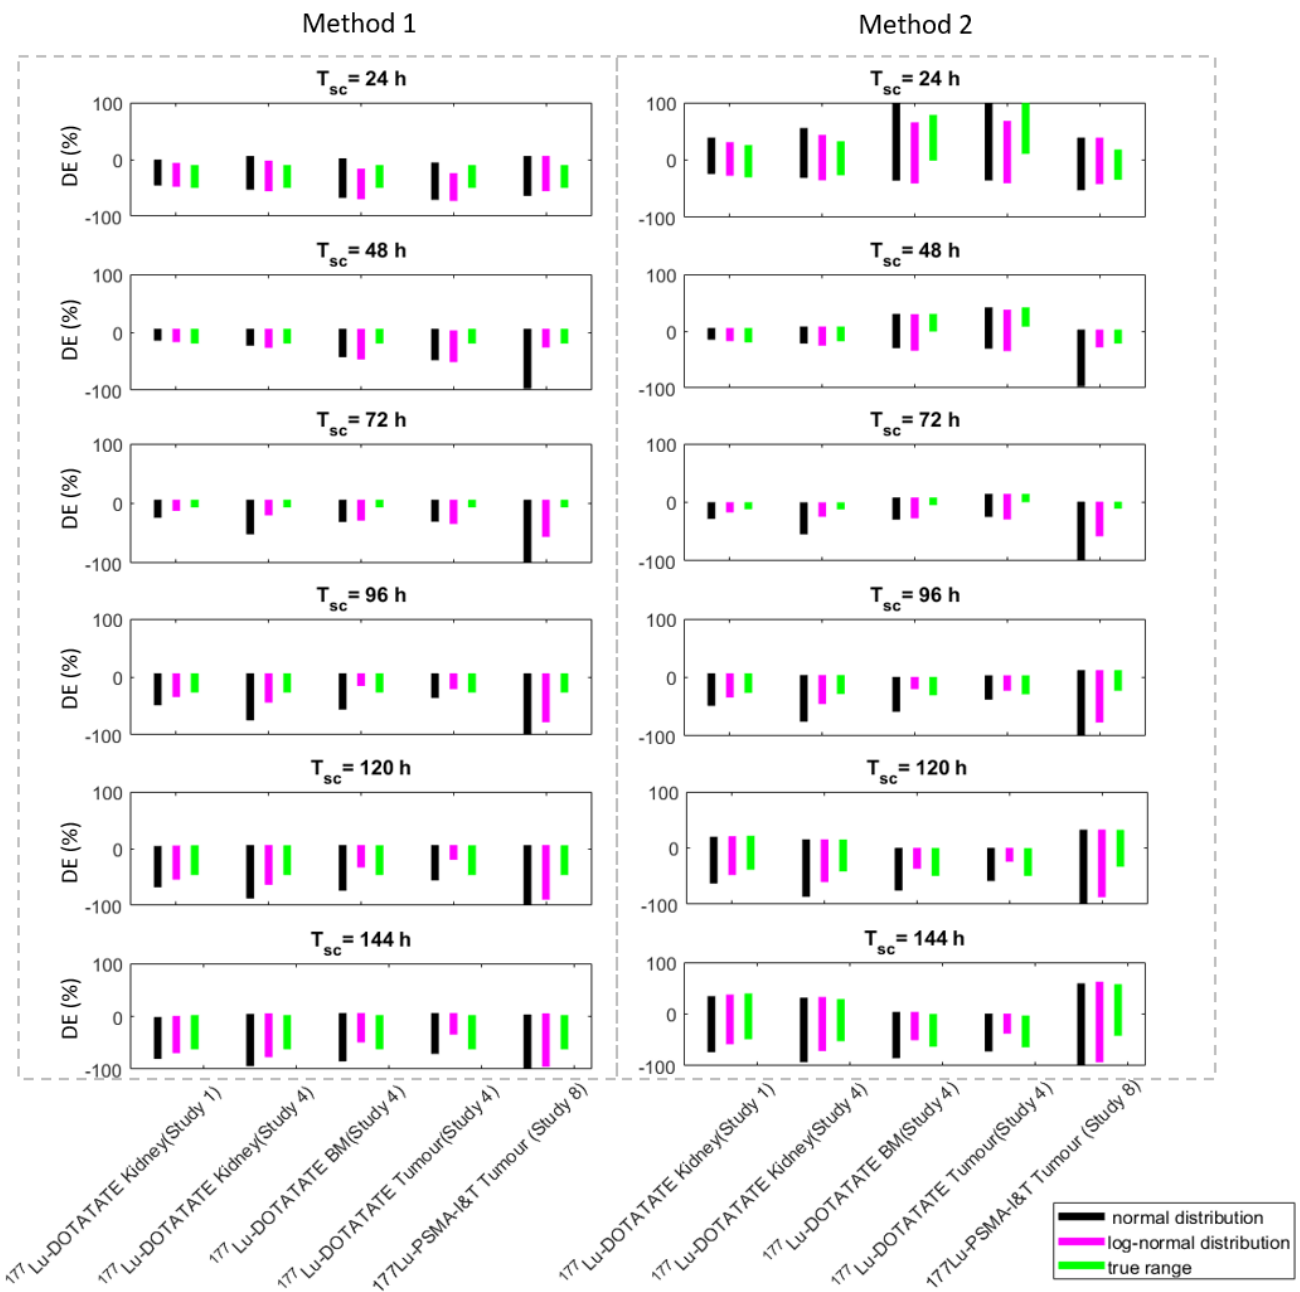

**Supplemental Figure 2:** Dose errors (DE, %) comparisons for ranges of half-lives computed based on (i) normal and (ii) log-normal distributions, as well as (iii) the true range of half-life values covering 95% of the data, for the five full datasets from Study 1, 4 and 8 with complete list of half-lives.

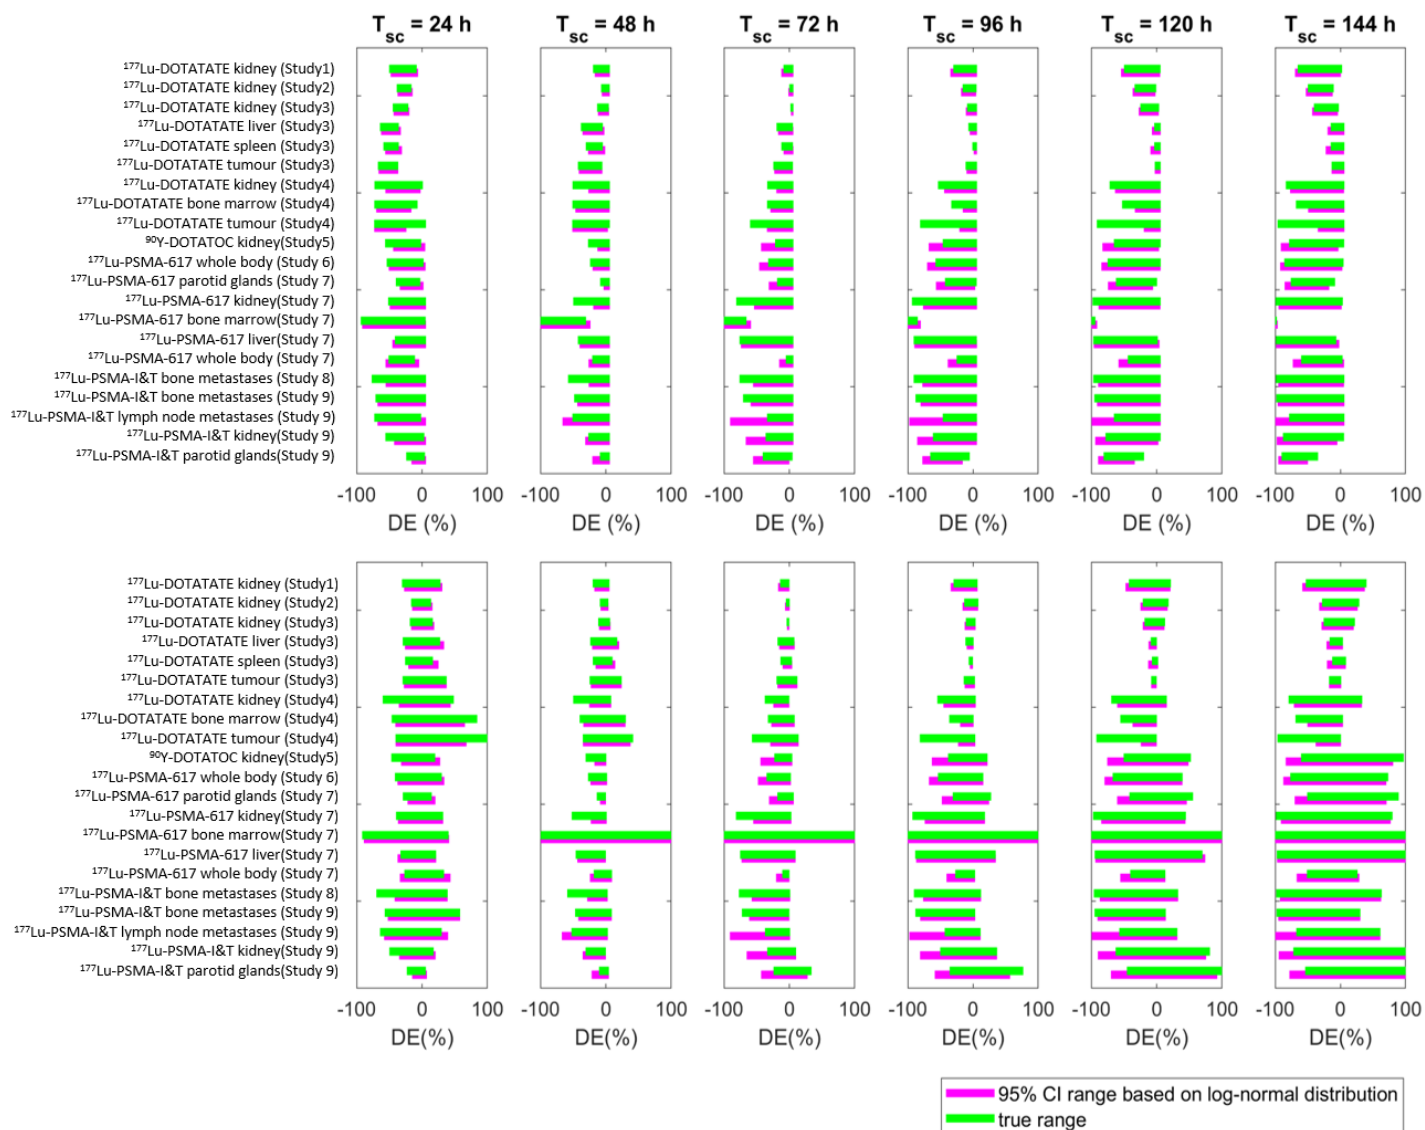

**Supplemental Figure 3:** DE(%) comparisons for ranges of half-lives computed based on (i) 95% CI range from estimated log-normal distributions and (ii) the true range of half-life values from published data. The upper plots represent the DE values for Method 1, while the lower plots represent the DE values for Method 2.

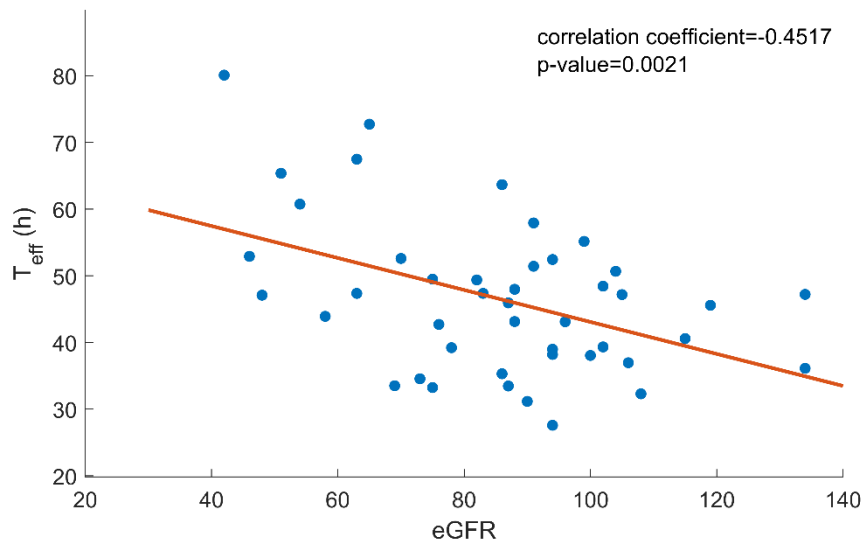

**Supplemental Figure 4:** The relationship between eGFR and patient specific half-life from Study 1 of Table 2.
